# Supplementary material for: Dithieno[3,2-b:2′,3′-d]silole-based low band gap polymers: the effect of fluorine and side chain substituents on photovoltaic performance
Source: Royal Society of Chemistry journal article supplement (doi:10.1039/c5py00849b), 2015-01-01
Supplement: c5py00849b1.pdf [file c5py00849b1.pdf]

## Electronic Supplementary Information

### **Dithieno[3,2-b:2',3'-d]silole-based low band gap polymers: the effect of fluorine and side chain substituents on photovoltaic performance**

Chuantao Gu<sup>a,c</sup>, Qianqian Zhu<sup>b</sup>, Xichang Bao<sup>a</sup>, Shuguang Wen<sup>a</sup>, Meng Qiu<sup>a</sup>, Liangliang Han<sup>a</sup>,  
Wei Huang<sup>a</sup>, Dangqiang Zhu<sup>a,c</sup>, Renqiang Yang<sup>a,d\*</sup>

<sup>a</sup> *CAS Key Laboratory of Bio-based Materials, Qingdao Institute of Bioenergy and Bioprocess  
Technology, Chinese Academy of Sciences, Qingdao 266101, China*

<sup>b</sup> *College of Materials Science and Engineering, Qingdao University of Science and Technology,  
Qingdao 266042, China*

<sup>c</sup> *University of Chinese Academy of Sciences, Beijing 100049, China*

<sup>d</sup> *State Key Laboratory of Luminescent Materials and Devices, South China University of Technology,  
Guangzhou 510641, China*

Correspondence to: R. Yang (E-mail: yangrq@qibebt.ac.cn)

## 1. X-ray Diffraction

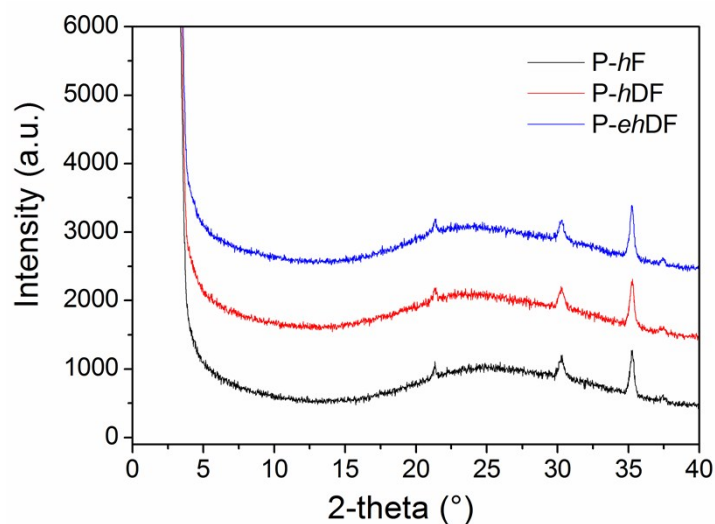

**Fig. S1.** Out-of-plane XRD patterns of **P-hF**, **P-hDF** and **P-ehDF**. Curves are offset for clarity.

## 2. TGA and DSC

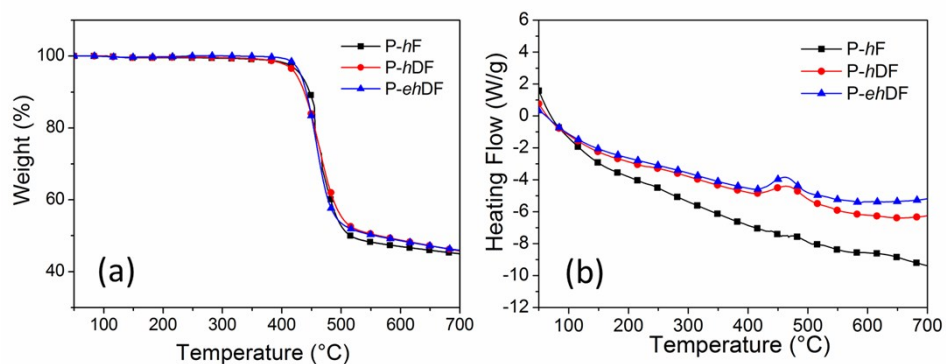

**Fig. S2** TGA (a) and DSC (b) curves of the polymers with a heating rate of  $10\text{ }^{\circ}\text{C min}^{-1}$  under nitrogen atmosphere.

### 3. Computational Study

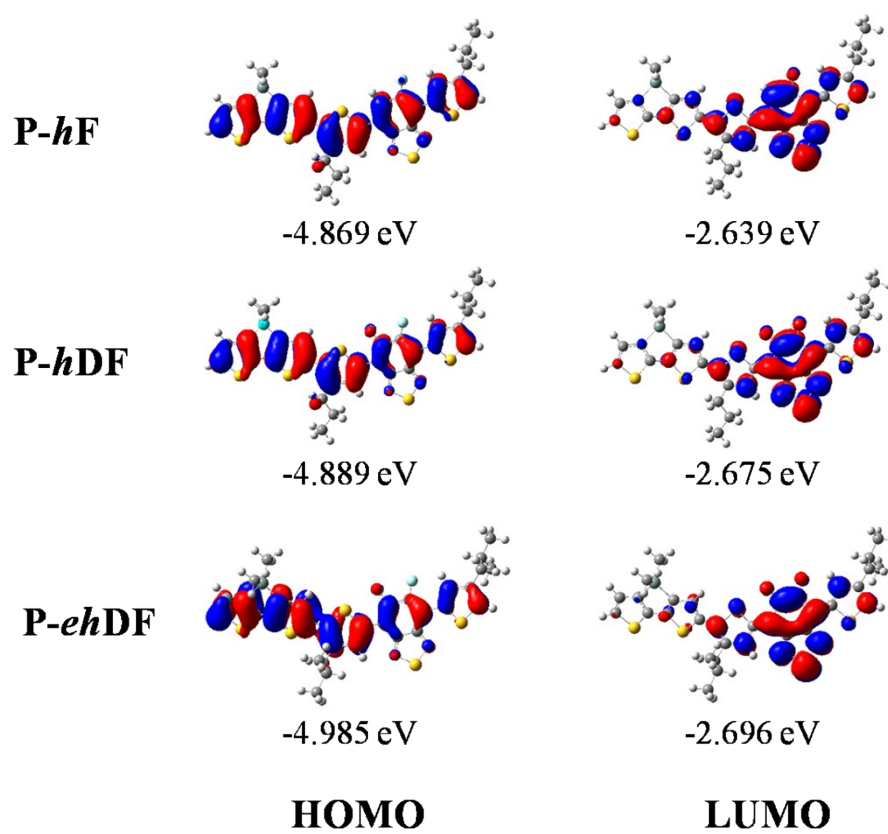

**Fig. S3.** The energies and distributions of the frontier molecular orbitals of the polymers<sup>1</sup>.

#### 4. Detailed device parameters of PSCs

**Table S1.** PSCs performance with device configuration  
ITO/PEDOT:PSS/polymer:PC<sub>71</sub>BM/Ca/Al

| Active layer                       | ratio      | DIO (%)    | $V_{OC}$ (V) | $J_{SC}$ (mA cm <sup>-2</sup> ) | FF (%)      | PCE (%)     |
|------------------------------------|------------|------------|--------------|---------------------------------|-------------|-------------|
| <b>P-hF</b> :PC <sub>71</sub> BM   | 1:1        | 0          | 0.620        | 14.04                           | 53.5        | 4.66        |
|                                    | <b>1:1</b> | <b>0.5</b> | <b>0.553</b> | <b>15.51</b>                    | <b>58.8</b> | <b>5.04</b> |
|                                    | 1:1        | 1          | 0.546        | 15.52                           | 58.6        | 4.97        |
|                                    | 1:1        | 2          | 0.543        | 15.91                           | 55.8        | 4.82        |
|                                    | 1:1.5      | 0.5        | 0.551        | 14.35                           | 59.1        | 4.67        |
|                                    | 1.5:1      | 0.5        | 0.594        | 10.87                           | 44.4        | 2.87        |
| <b>P-hDF</b> :PC <sub>71</sub> BM  | 1:1        | 0          | 0.683        | 10.90                           | 64.0        | 4.76        |
|                                    | 1:1        | 0.5        | 0.623        | 12.57                           | 64.2        | 5.03        |
|                                    | <b>1:1</b> | <b>1</b>   | <b>0.593</b> | <b>15.98</b>                    | <b>64.8</b> | <b>6.14</b> |
|                                    | 1:1        | 2          | 0.602        | 14.67                           | 66.9        | 5.91        |
|                                    | 1:1.5      | 1          | 0.605        | 11.24                           | 62.5        | 4.25        |
|                                    | 1.5:1      | 1          | 0.623        | 12.28                           | 62.5        | 4.78        |
| <b>P-ehDF</b> :PC <sub>71</sub> BM | <b>1:2</b> | <b>0</b>   | <b>0.805</b> | <b>8.01</b>                     | <b>62.6</b> | <b>4.03</b> |
|                                    | 1:2        | 1          | 0.753        | 4.72                            | 56.2        | 2.00        |
|                                    | 1:2        | 2          | 0.749        | 5.11                            | 52.4        | 2.01        |
|                                    | 1:1        | 0          | 0.827        | 6.05                            | 54.3        | 2.72        |
|                                    | 1:1.5      | 0          | 0.811        | 7.40                            | 59.5        | 3.57        |
|                                    | 1:3        | 0          | 0.753        | 8.81                            | 44.8        | 2.97        |

## 5. Hole mobility

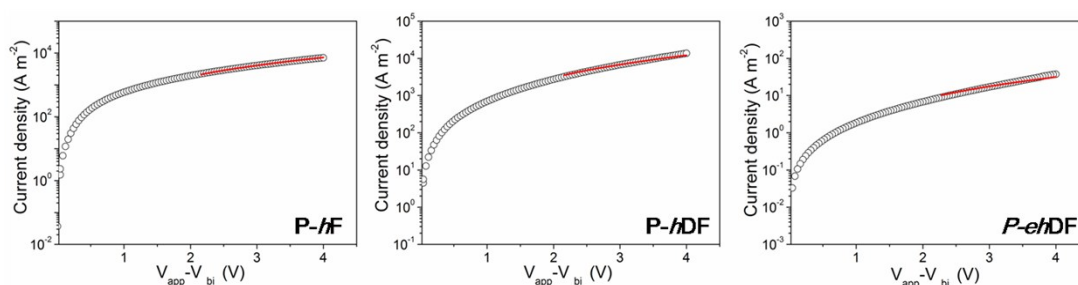

**Fig. S4.** Current density–voltage ( $J$ - $V$ ) curves for polymer:PC<sub>71</sub>BM based device (the symbols are experimental data for transport of hole, and the red line is fitted according to the space-charge-limited-current model). The devices were constructed as ITO/PEDOT:PSS (40 nm)/polymer:PC<sub>71</sub>BM (110 nm)/MoO<sub>3</sub> (10 nm)/Al (100 nm).

### References:

1. M. J. Frisch, G. W. Trucks, H. B. Schlegel, G. E. Scuseria, M. A. Robb, J. R. Cheeseman, G. Scalmani, V. Barone, B. Mennucci, G. A. Petersson, H. Nakatsuji, M. Caricato, X. Li, H. P. Hratchian, A. F. Izmaylov, J. Bloino, G. Zheng, J. L. Sonnenberg, M. Hada, M. Ehara, K. Toyota, R. Fukuda, J. Hasegawa, M. Ishida, T. Nakajima, Y. Honda, O. Kitao, H. Nakai, T. Vreven, J. A. Montgomery, J. E. Peralta, F. Ogliaro, M. Bearpark, J. J. Heyd, E. Brothers, K. N. Kudin, V. N. Staroverov, R. Kobayashi, J. Normand, K. Raghavachari, A. Rendell, J. C. Burant, S. S. Iyengar, J. Tomasi, M. Cossi, N. Rega, J. M. Millam, M. Klene, J. E. Knox, J. B. Cross, V. Bakken, C. Adamo, J. Jaramillo, R. Gomperts, R. E. Stratmann, O. Yazyev, A. J. Austin, R. Cammi, C. Pomelli, J. W. Ochterski, R. L. Martin, K. Morokuma, V. G. Zakrzewski, G. A. Voth, P. Salvador, J. J. Dannenberg, S. Dapprich, A. D. Daniels, Ö. Farkas, J. B. Foresman, J. V. Ortiz, J. Cioslowski, and D. J. Fox, Gaussian 09, Revision A.1, Gaussian, Inc., Wallingford CT, 2009.
